# Supplementary material for: AREHS: effects of changing boundary conditions on the development of hydrogeological systems: numerical long-term modelling considering thermal–hydraulic–mechanical (–chemical) coupled effects
Source: Copernicus journal article supplement (doi:10.5194/sand-2-117-2023), 2023-09-06

# Automatized large-scale 3D THM simulations capturing glacial cycle effects on German nuclear waste repositories in salt rock

Florian Zill<sup>1,2</sup>, Christian B. Silbermann<sup>2</sup>, Tobias Meisel<sup>1</sup>, Friederike Tiedtke<sup>2</sup>, Dominik Kern<sup>2</sup>, Anton Carl<sup>3</sup>, Andreas Jockel<sup>3</sup>, Thomas Nagel<sup>2</sup>, Olaf Kolditz<sup>1</sup>, Heinz Konietzky<sup>2</sup> and René Kahnt<sup>4</sup>

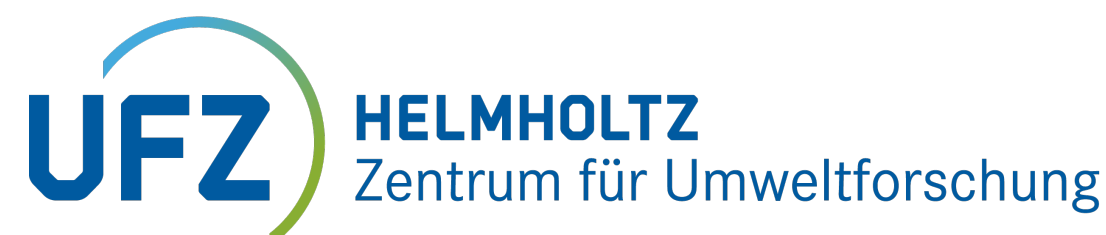

1: Helmholtz-Centre for Environmental Research (UFZ), Leipzig, Germany (florian.zill@ufz.de)

2: Institute of Geotechnics, TU BA Freiberg, Freiberg, Germany

3: ERCOSPLAN Erfurter Consulting und Planungsbüro GmbH, Erfurt, Germany

4: G.E.O.S. Ingenieurgesellschaft mbH, Halsbrücke, Germany

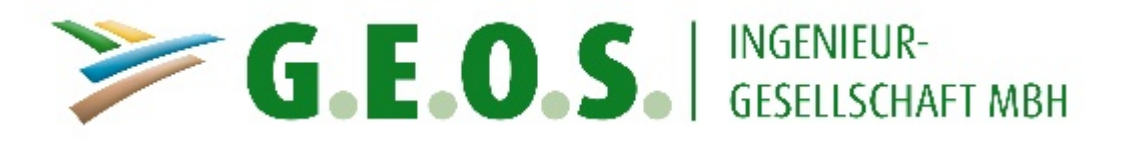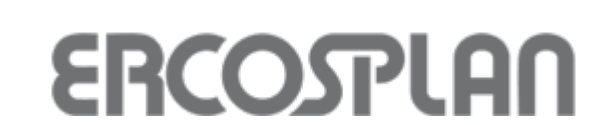

## Introduction

- Glaciation cycles may be critical for safety assessment of nuclear waste repository sites
- We studied time-dependent boundary conditions with thermo-hydro-mechanical coupling
- Complex THM-simulation studies are performed on layered geological models
- Open-source multi-field finite element code **OpenGeoSys** is used

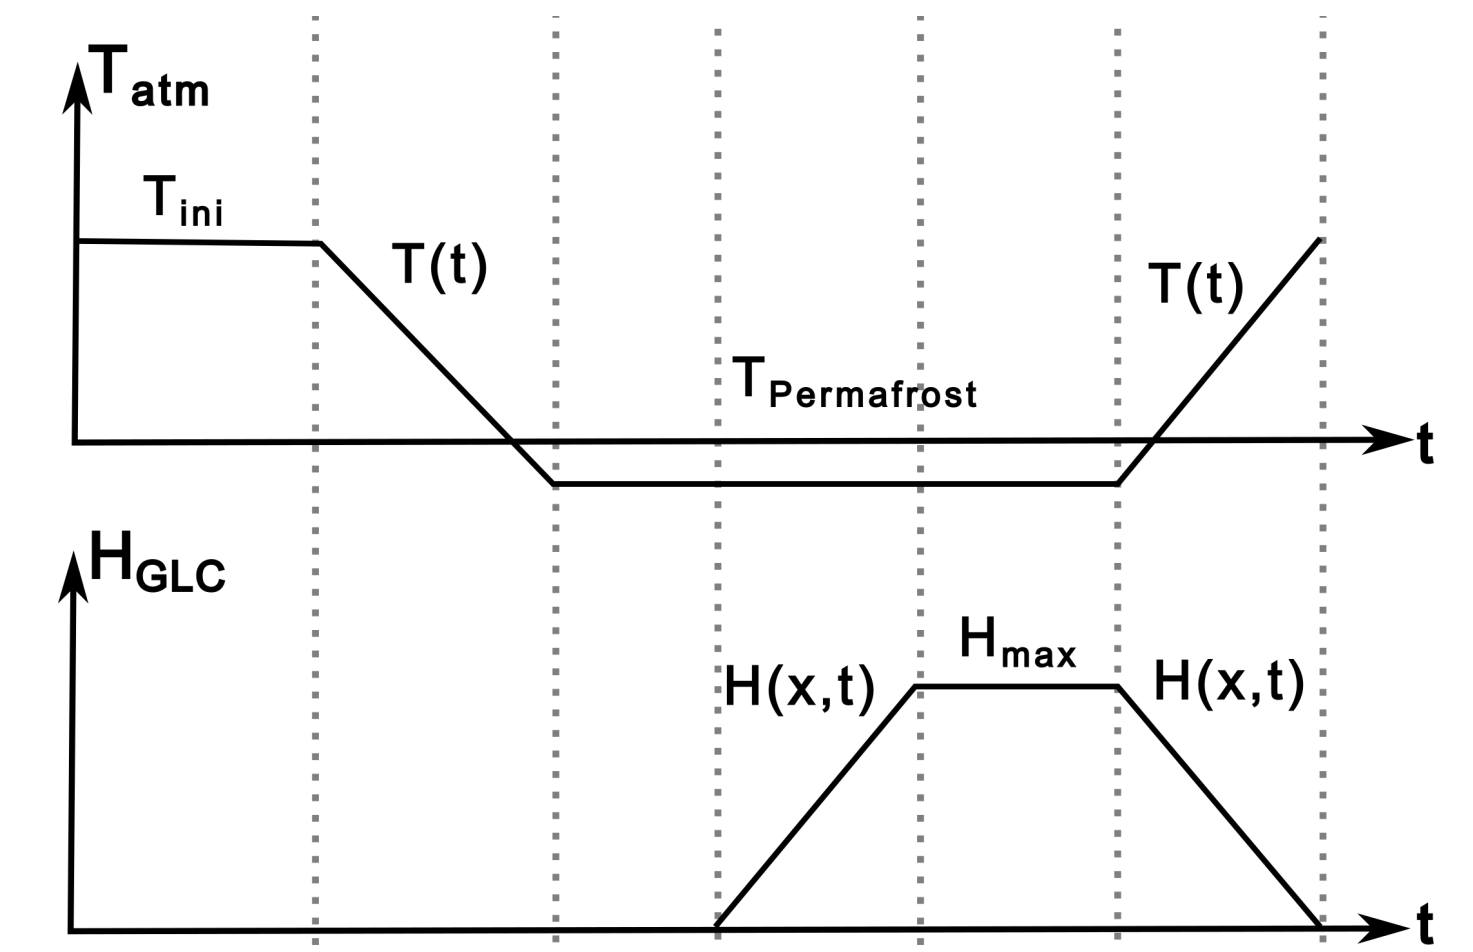

## Methodology

- Complete simulation workflow automatized via snakemake
- Finite element meshes from geological data
- 14 different stratigraphic layers, individual material properties
- Glacial cycles as complex time-dependent boundary conditions
  - Temperature evolution, permafrost inhibits hydraulic flow
  - Glacier-induced mechanical load and hydraulic pressure
- Repository as planar heat source with exponential decay
- Model is fully implicit THM coupled
- Salt rock hydraulically deactivated, viscoplastic material model
  - Linear term corresponds to pressure solution creep

$$\dot{\epsilon}^{cr} = A \exp(-Q/RT) \left( \frac{\sigma}{\sigma_f} \right)^n + \frac{A_2}{D^3 T} \exp(-Q_2/RT) \left( \frac{\sigma}{\sigma_f} \right)$$

## Results

- Mesh refinement showed expected convergence behavior
- Nuclear waste heat dissipated after ~15,000 years
  - Reduction of permafrost depth in front of glacier
- Recurring displacements due to glacial loading
  - Creep displacement accumulation in salt layers
- High shear strains at salt interface zones
- No lasting thermal or hydraulic effects
- Numerically difficult hydrothermal conditions can lead to

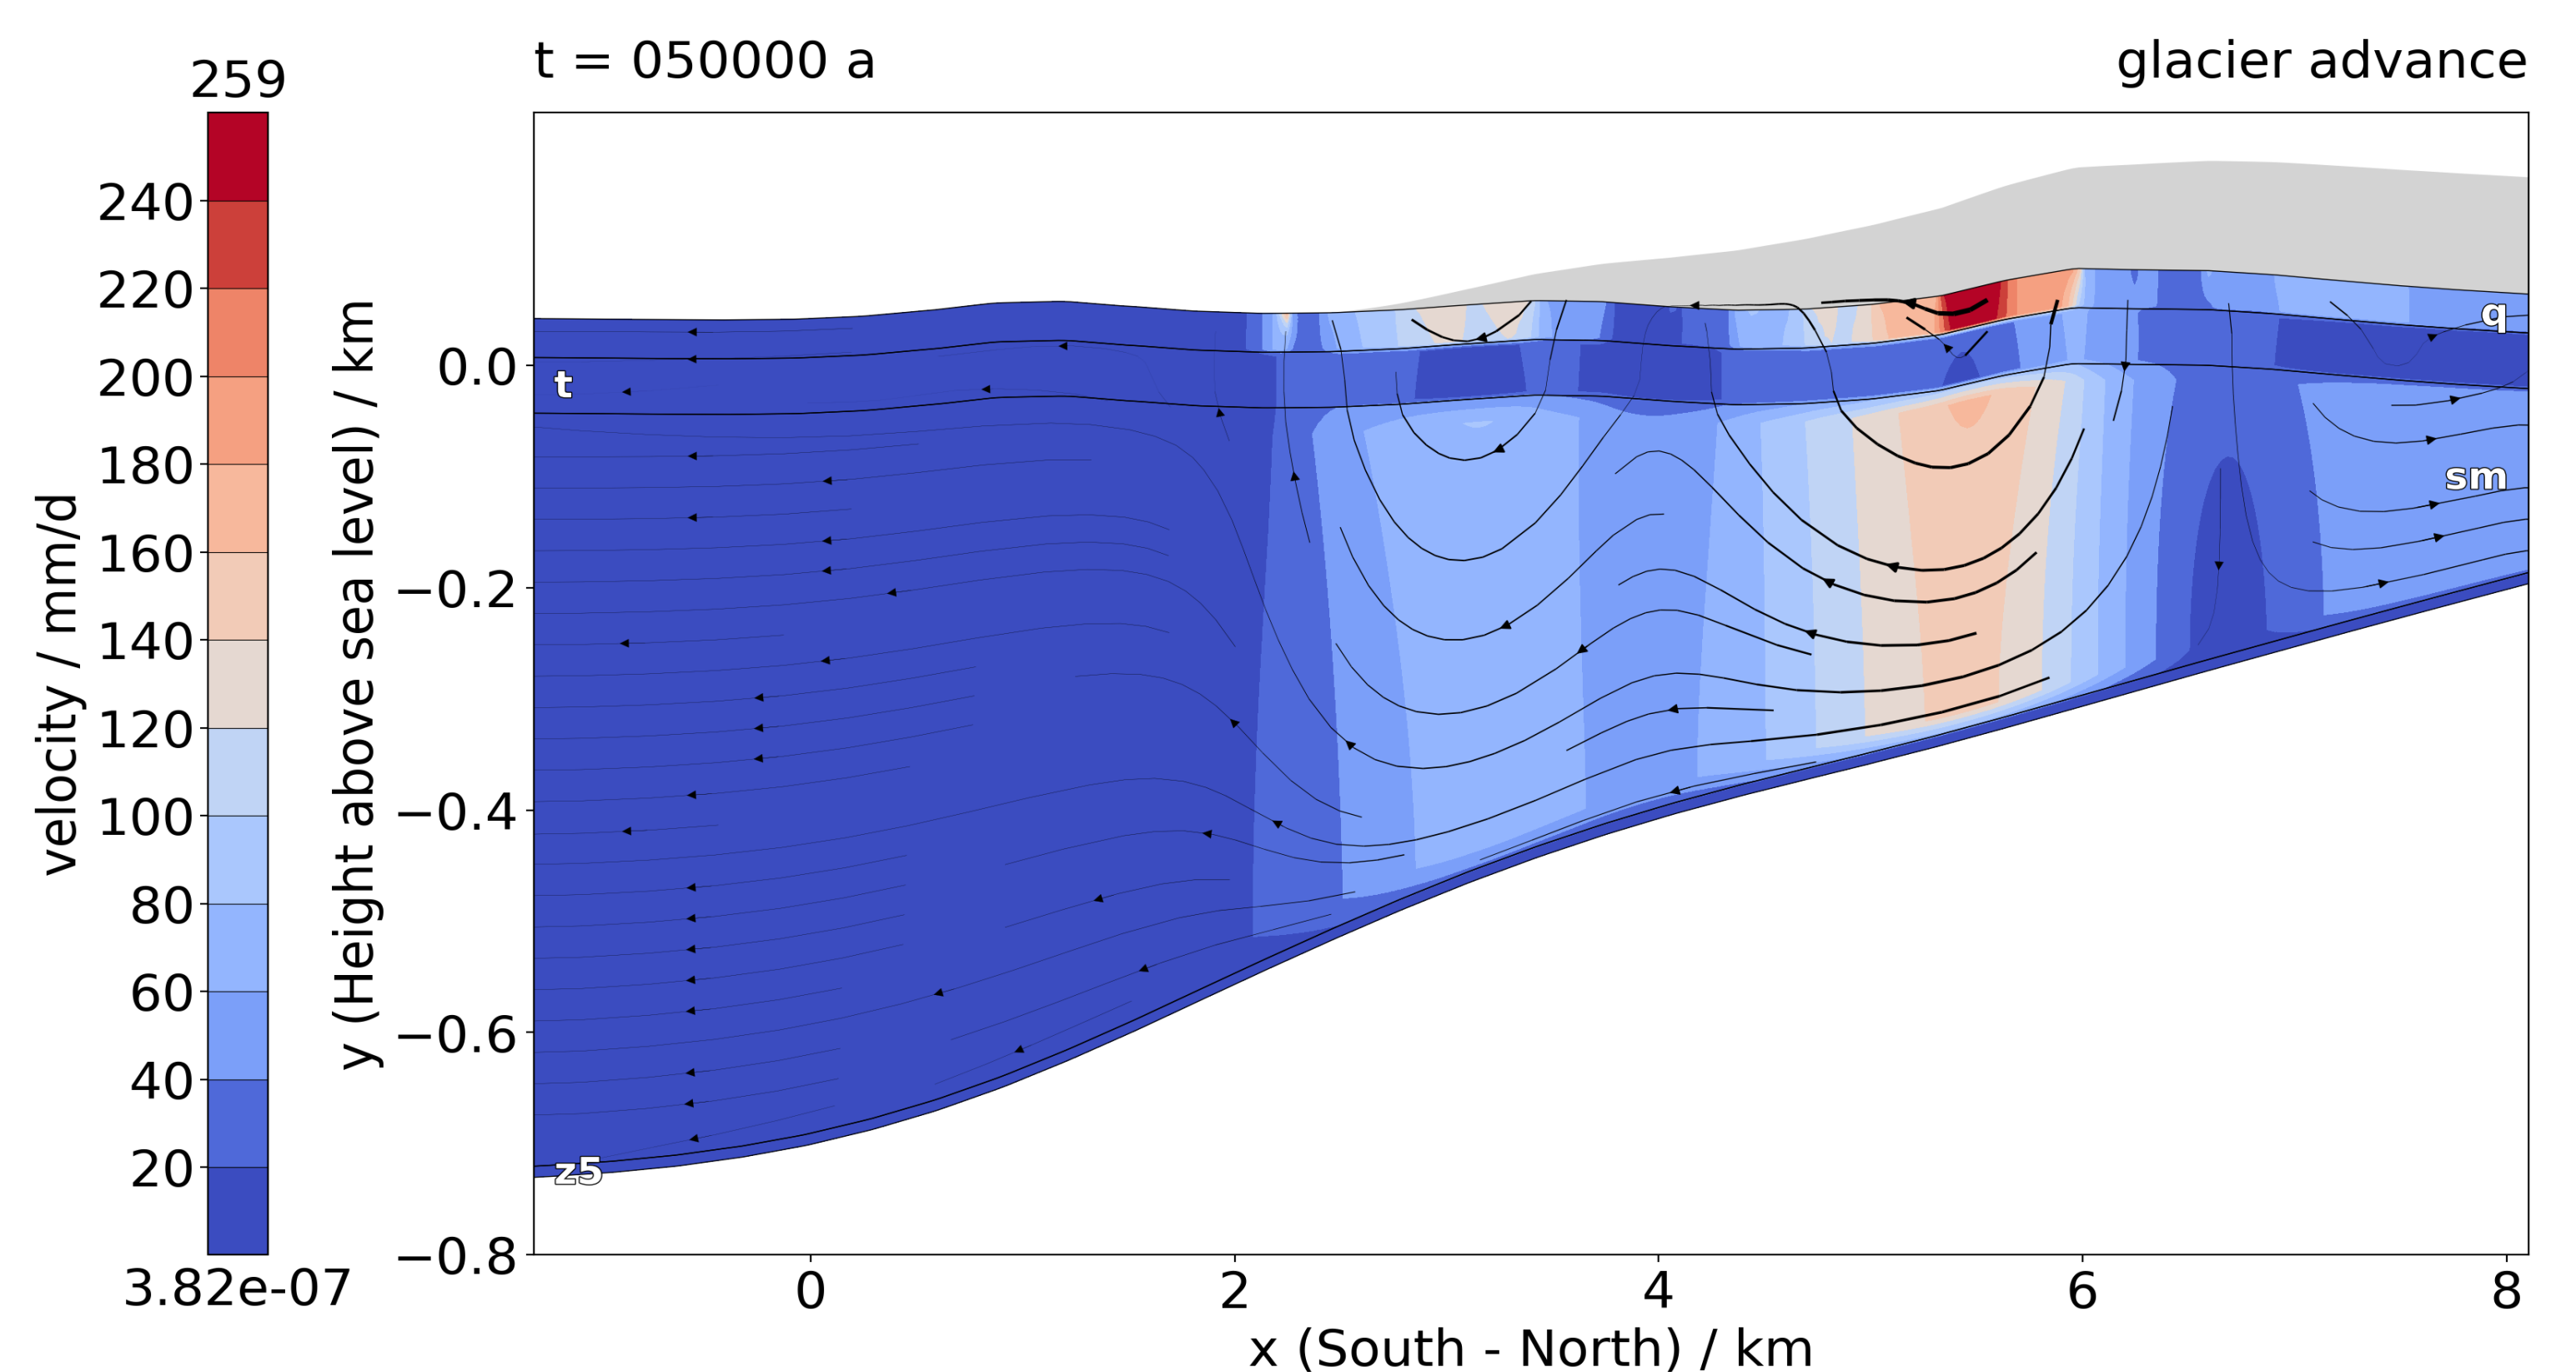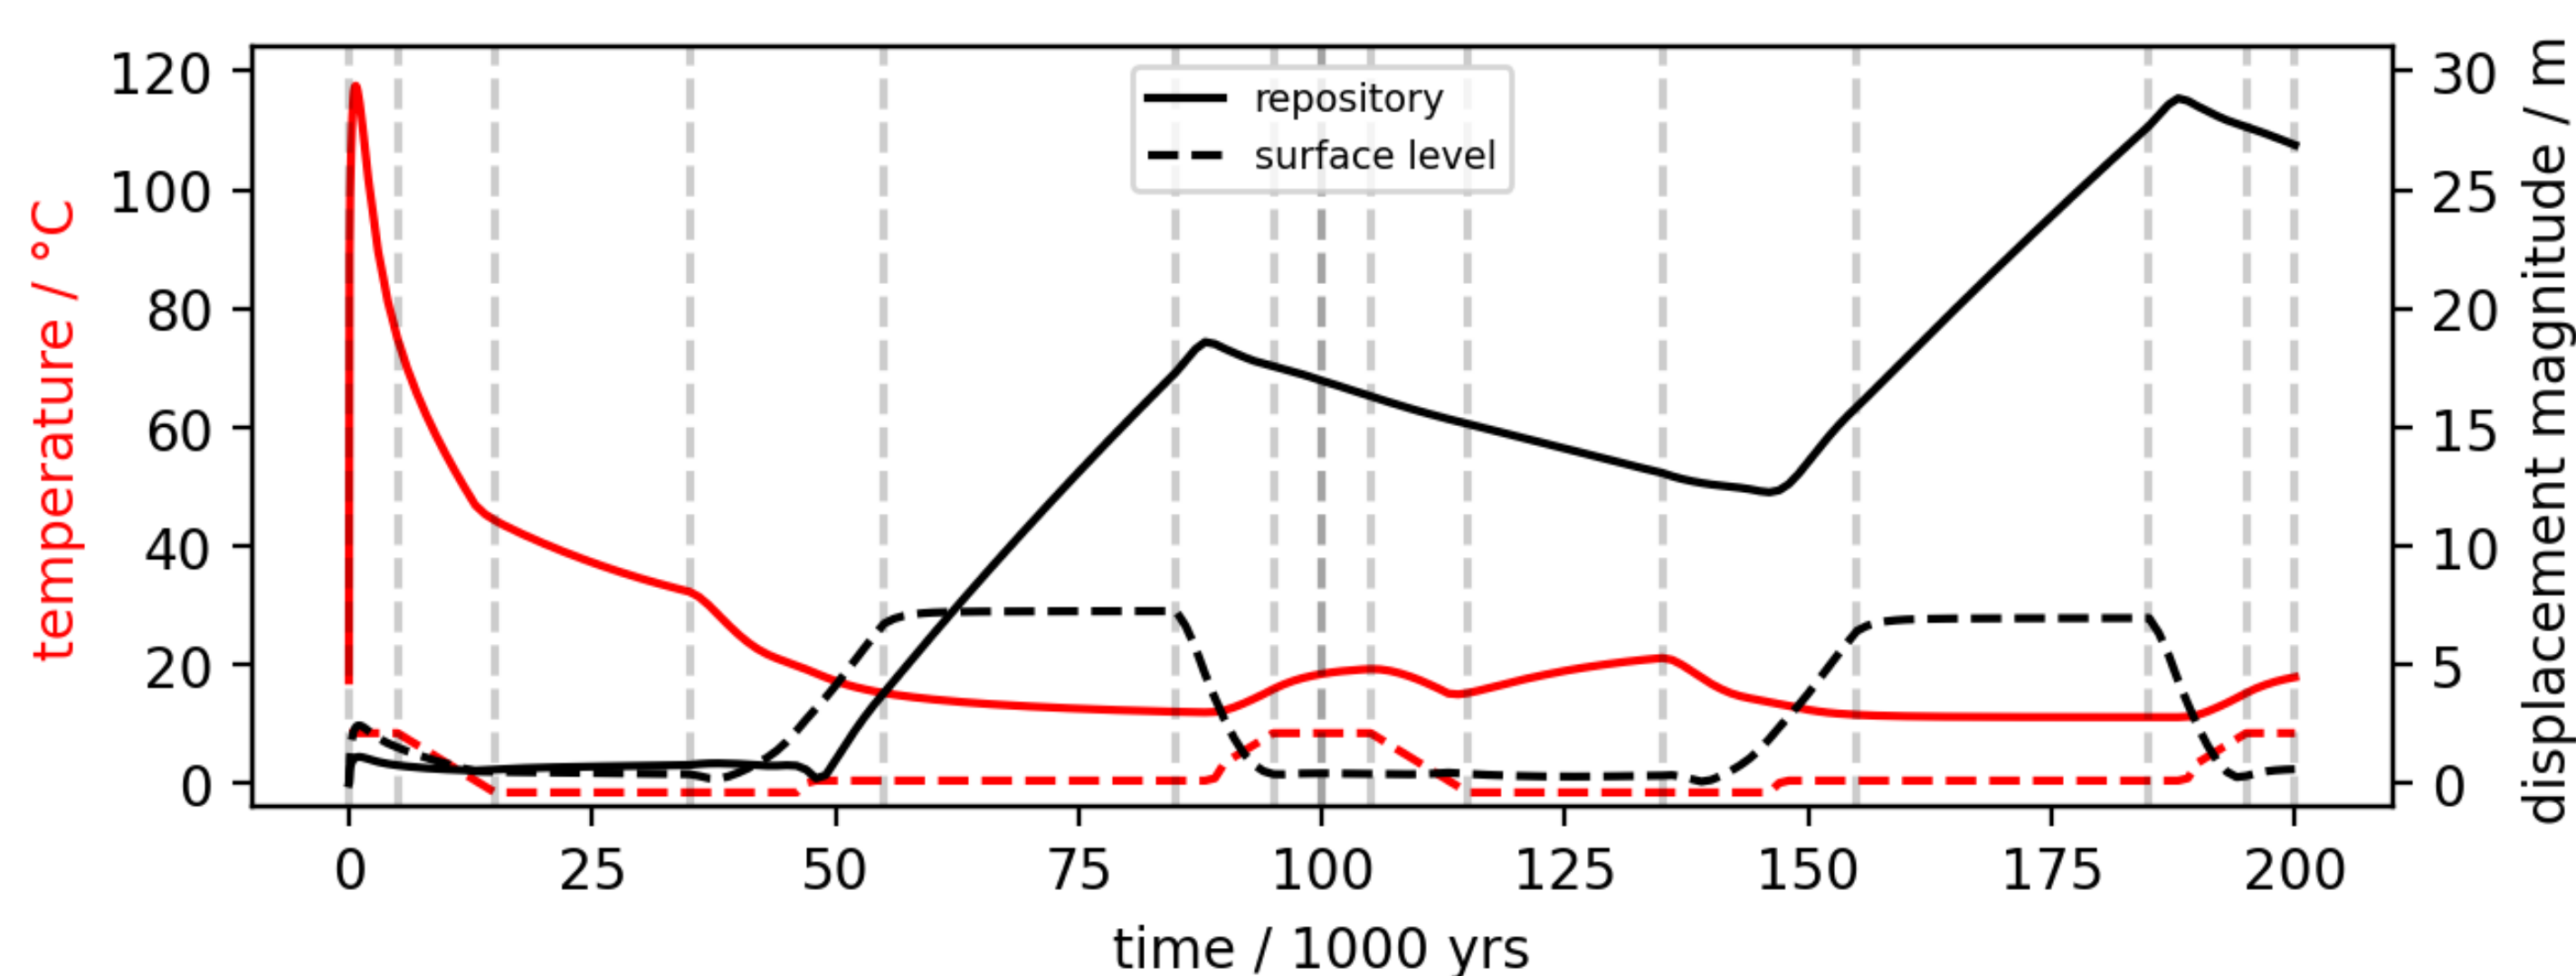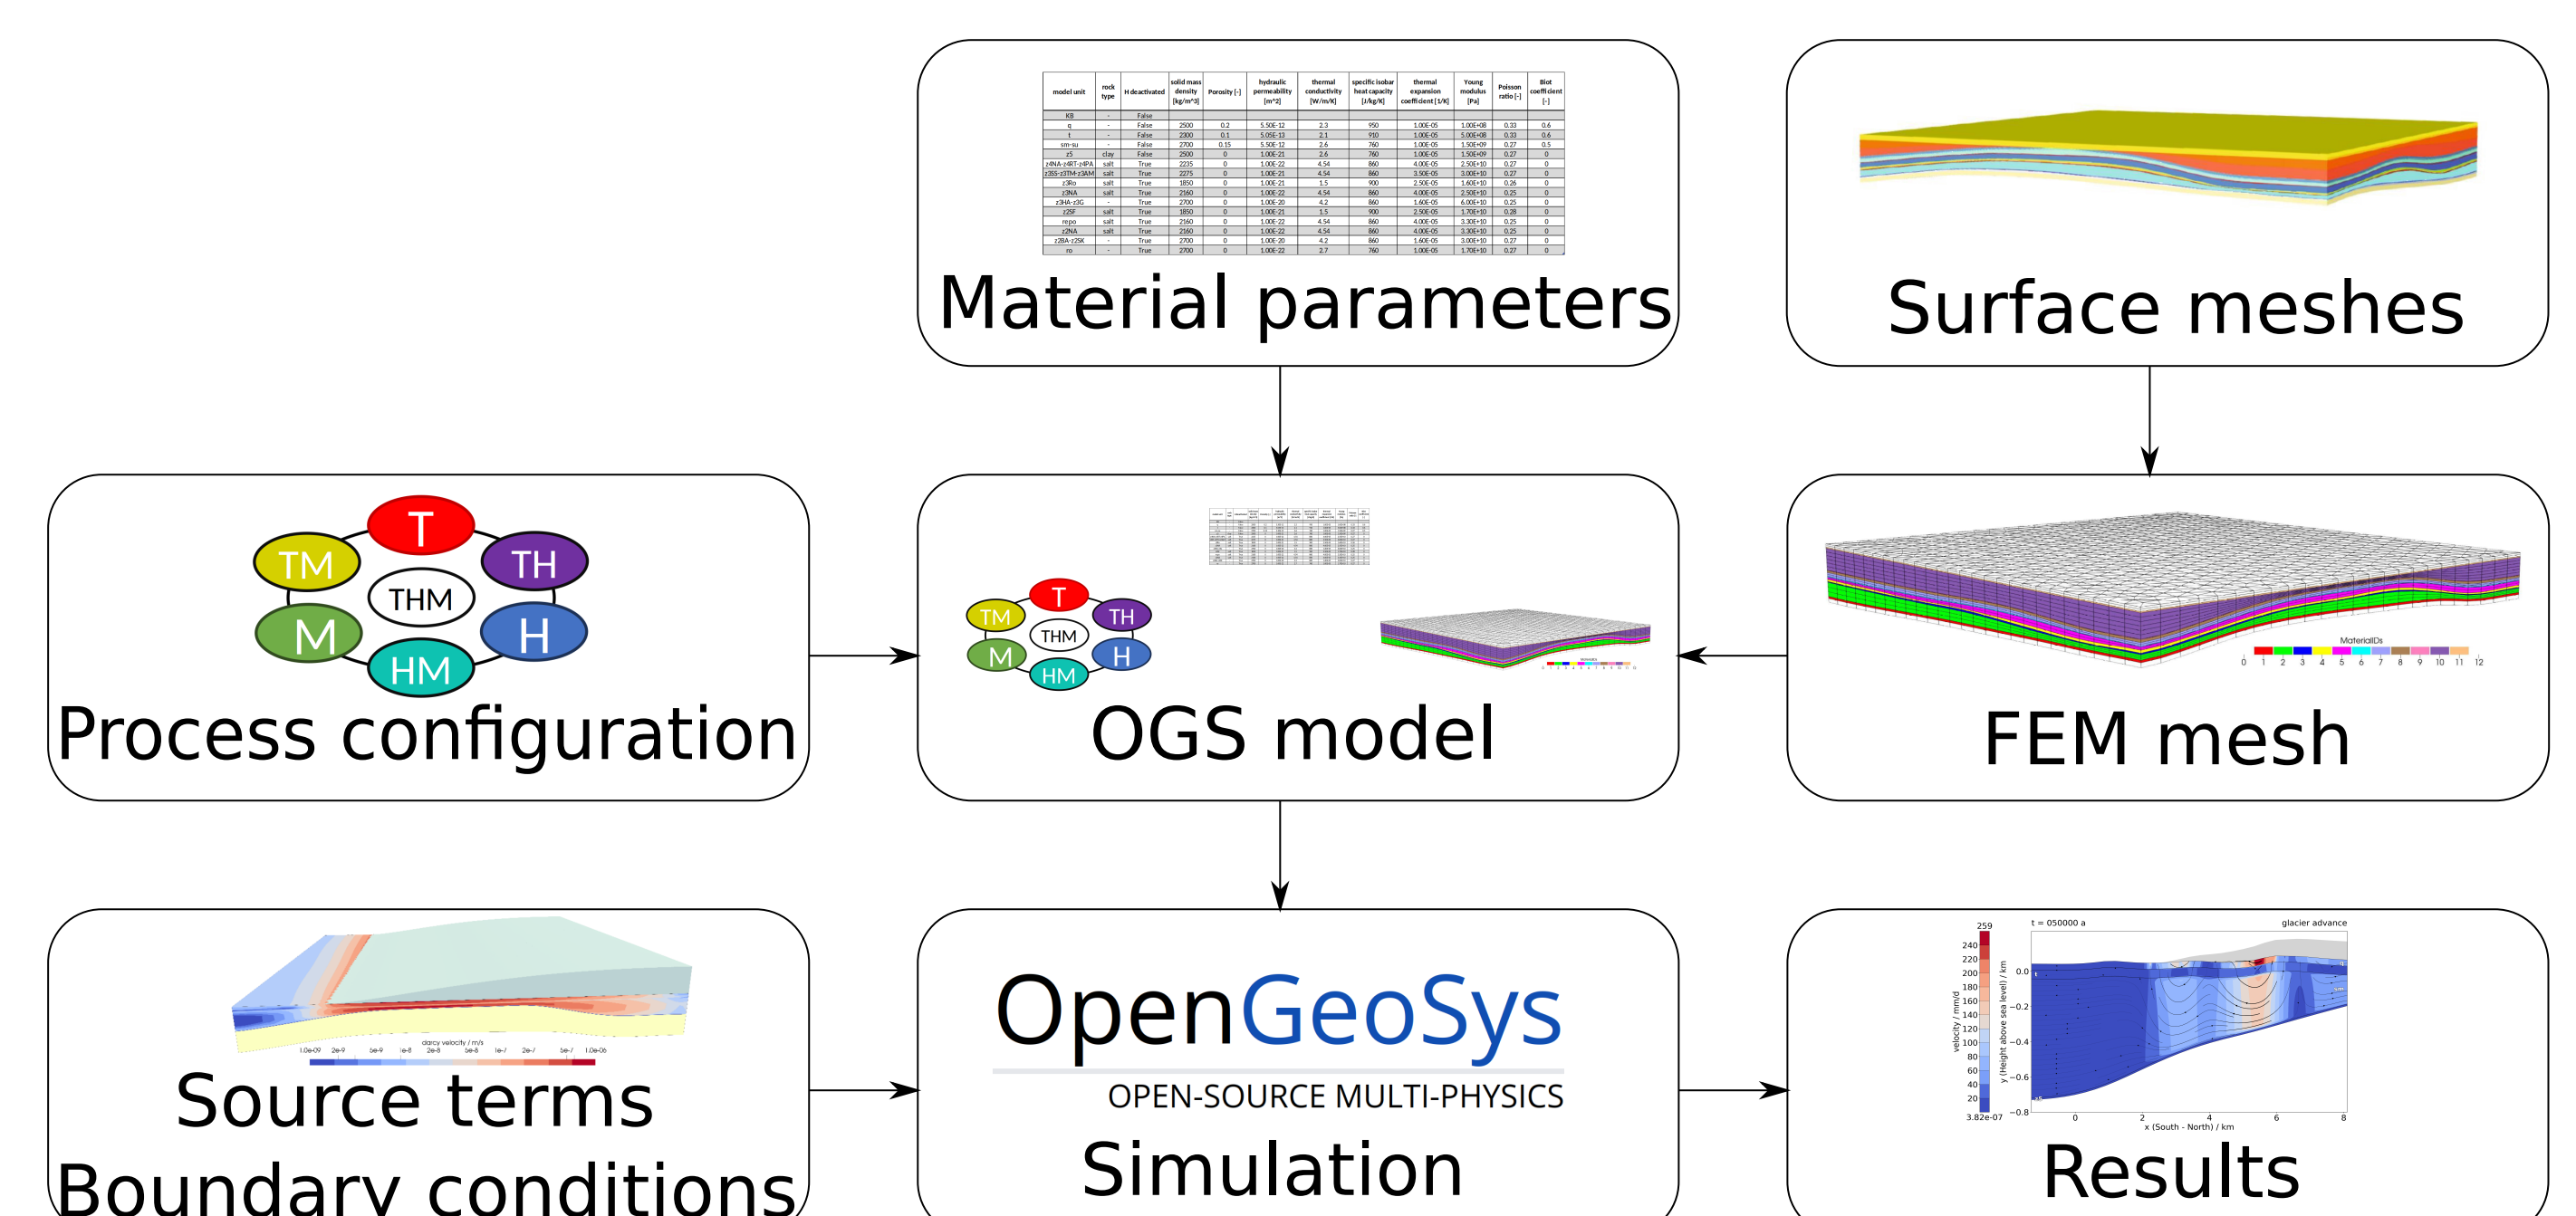

## Conclusions & Outlook

- workflow automatization greatly improved our research in speed and quality
  - testing different model setups quickly boosts problem understanding
- salt creep rate outperforms deviatoric stresses (parameters need further research)
- large shear strains → interface elements or a large deformation FEM approach
- far-field simulation results might be used as boundary conditions for embedded near-field models
  - permeability or fracture models can be applied on this scale

**Acknowledgement:** This research is funded by the Federal Office for the Safety of Nuclear Waste Management under Grant No. 4719F10402 (AREHS project).

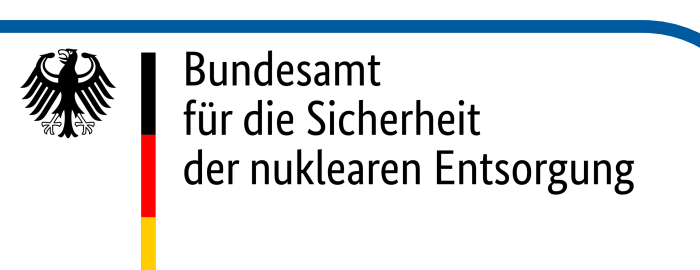

Supplement: Supplementary file 3 [file sand-2-117-2023-supplement.zip › sand-2023-104_SAFEND2023_POSTER_ZILL_MEISEL.pdf]
