# Supplementary material for: AREHS: effects of changing boundary conditions on the development of hydrogeological systems: numerical long-term modelling considering thermal–hydraulic–mechanical (–chemical) coupled effects
Source: Copernicus journal article supplement (doi:10.5194/sand-2-117-2023), 2023-09-06
Supplement: Supplementary file 1 [file sand-2-117-2023-supplement.zip]

# AREHS: Effects of changing boundary conditions on the evolution of hydrogeological systems: Numerical long-term modeling considering thermal-hydraulic-mechanical (-chemical) coupled effects

Funded by: Bundesamt für die Sicherheit der nuklearen Entsorgung (BASE, Ref-ID: 4719F10402)

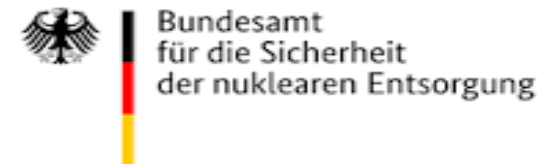

Authors: R. Kahnt<sup>1</sup>, C. B. Silbermann<sup>2</sup>, F. Tiedtke<sup>2</sup>, F. Zill<sup>3</sup>, T. Meisel<sup>3</sup>, A. Carl<sup>4</sup>, A. Gabriel<sup>1</sup>, M. Schlegel<sup>1</sup>, H. Konietzky<sup>2</sup>, T. Nagel<sup>2</sup> and A. Jockel<sup>4</sup>

<sup>1</sup>G.E.O.S., <sup>2</sup>TU Freiberg, <sup>3</sup>UFZ Leipzig, <sup>4</sup>Ercosplan

**safeND, Berlin, 13. - 15.09.2023**

# Objectives of AREHS

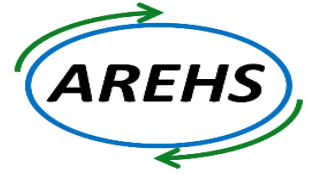

- **Understanding:** Increase the understanding of the impact of future warm and cold periods including glaciation on the geological system in the vicinity of the host rock
- **Concept:** Development of a consistent concept for quantification of the changes over a period of 1 mill yrs. as a basis for long term safety analysis
- **Workflow:** Development and verification of a THM(C) - modeling toolbox for all three types of host rocks (salt, clay and crystalline rocks)

# Processes and numerical codes

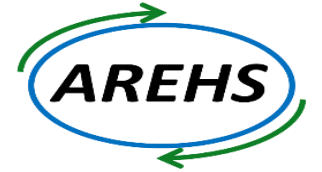

## Basic processes and coupling based on FEP-tables:

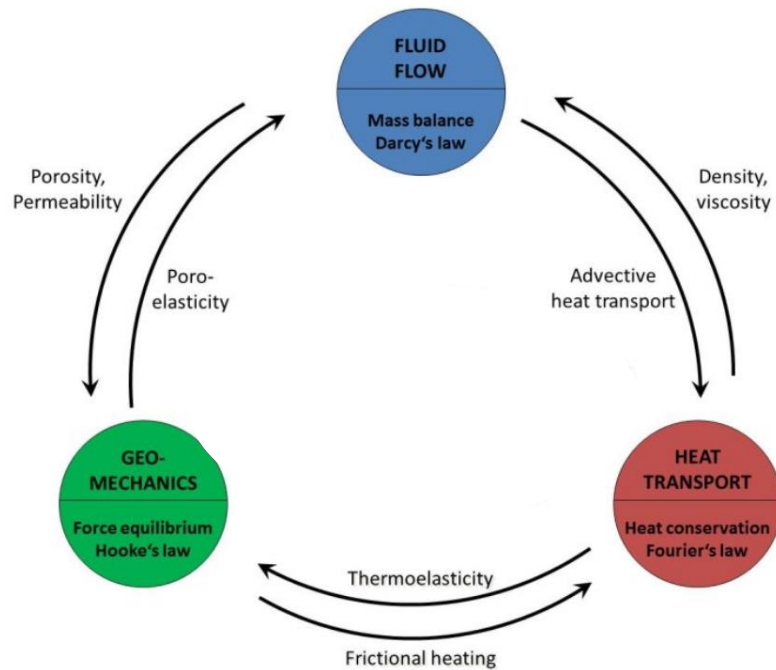

From Gaucher u. a., 2015

**Considering the spatial scale and the temporal scale of up to 1 mill yr**

## Numerical codes:

Salt rock: OpenGeoSys

Clay rock: OpenGeoSys

Crystalline rock: 3DEC + DFN.lab

**Have been successfully verified**

# Workflow

# OGS - Workflow Clay Rock and Salt Rock

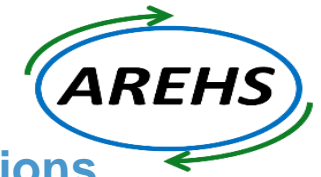

„manual“ input / automatically generated by transformations

→ Transformation =  
automated routine

 **snakemake**  
manages the transformations

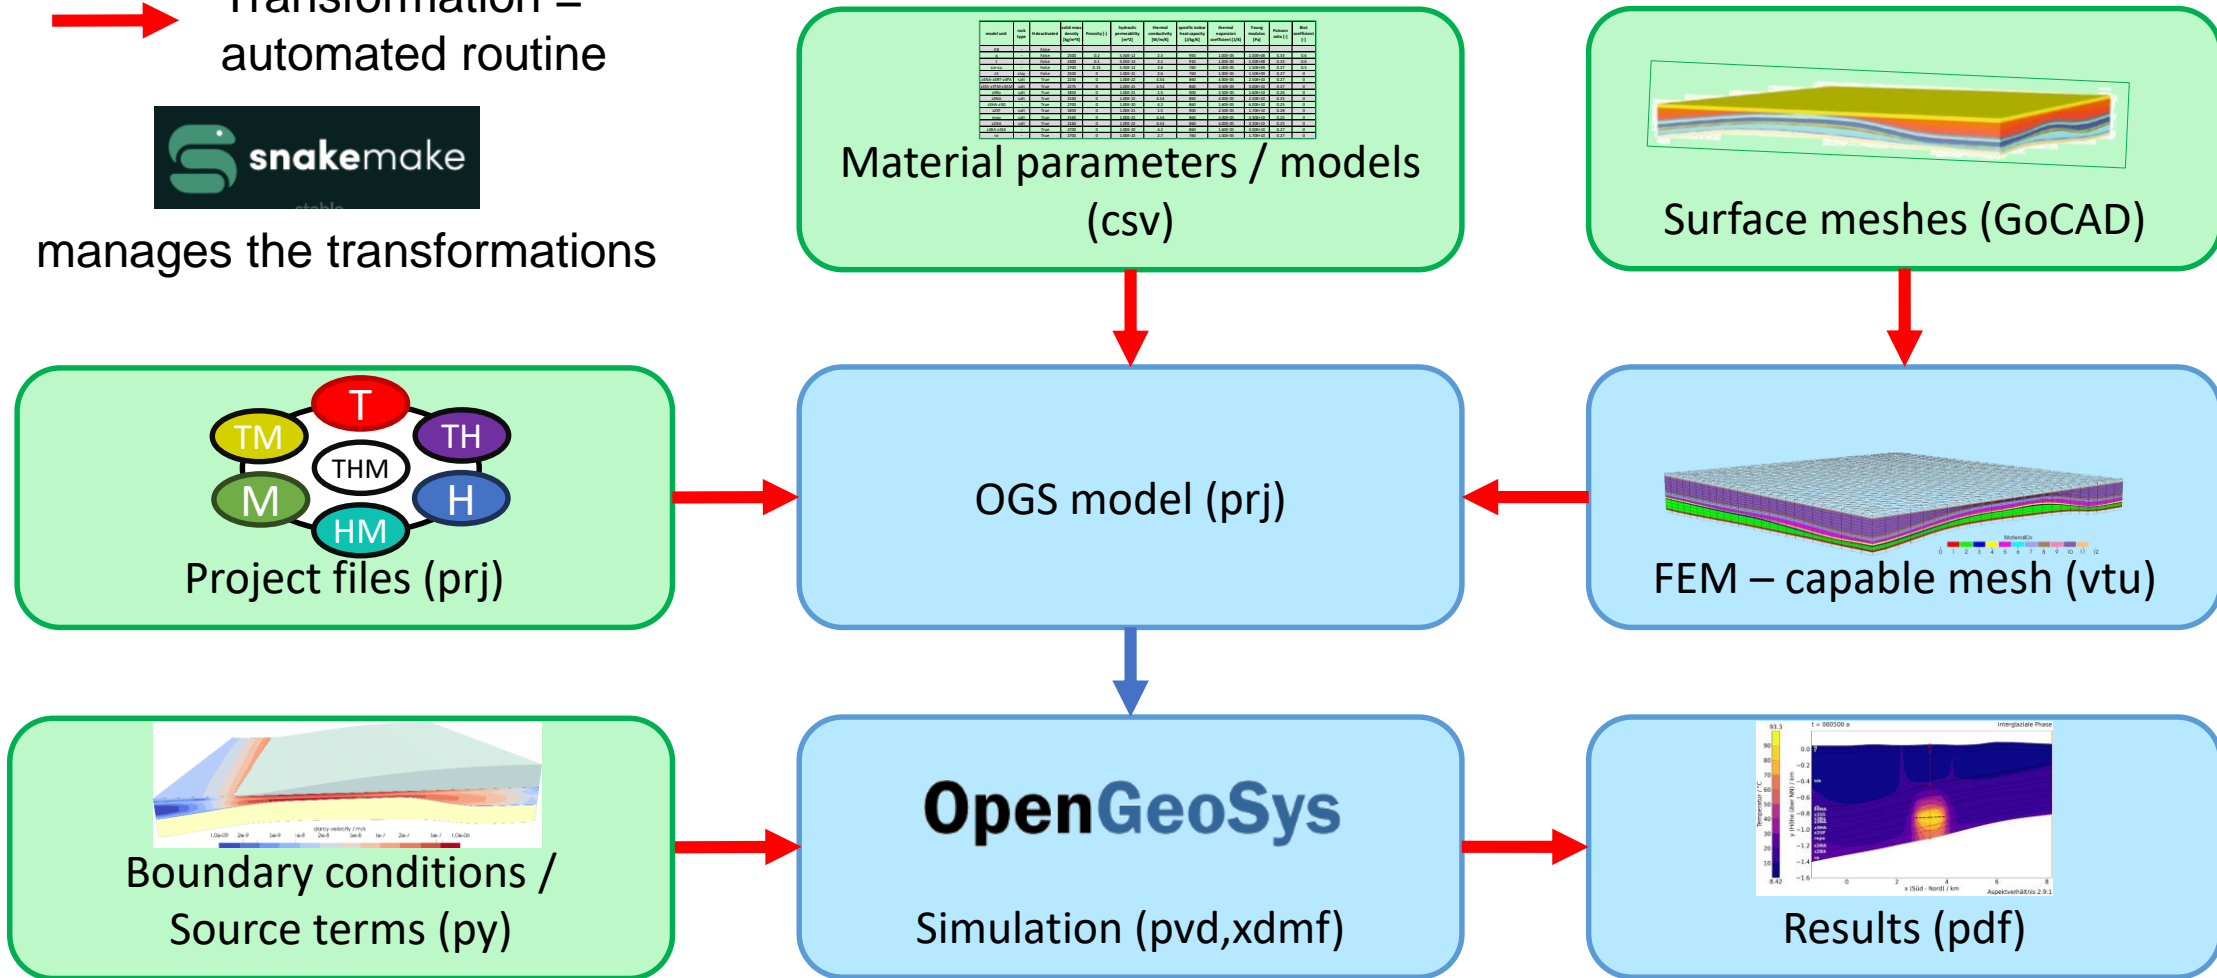

# Workflow Crystalline Rock: 3DEC + DFN.Lab

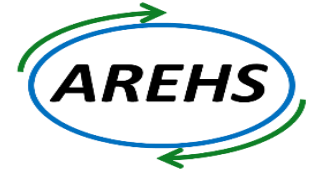

→ Development of a “DFN-DEM”<sup>\*</sup> modelling workflow

Combining the DEM-Software „3DEC“ and DFN-Software „DFN.Lab“

→ Idea: “outsourcing” flow calculation

- 3DEC: thermal + mechanical calculation
- DFN.Lab: hydraulic calculation

→ **Realization:**

- Sequential THM calculation scheme
- 3DEC structure elements („subcontacts“) used for “information exchange”
- Fracture contours, normal displacement/apertures, fluid pressure are constantly exchanged between 3DEC and DFN.Lab

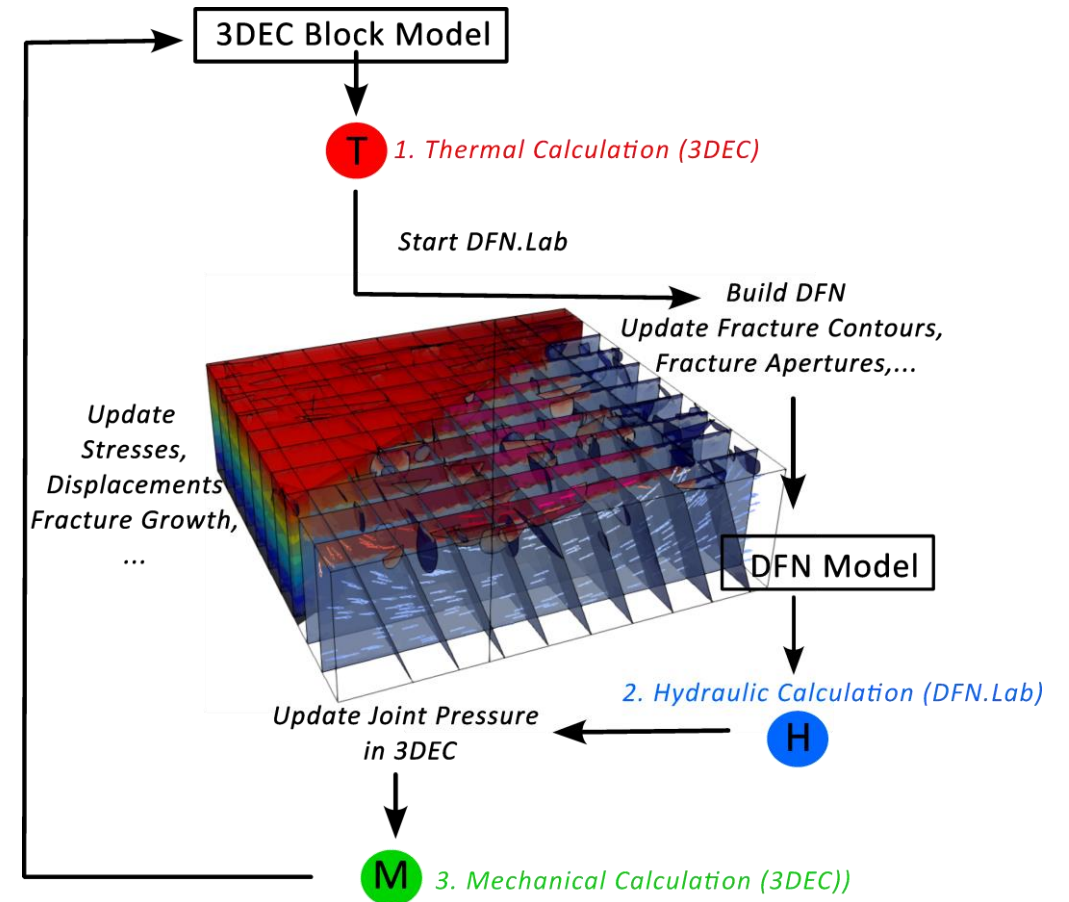

<sup>\*</sup>DEM = Distinct Element Method, 3DEC  
DFN = Discrete Fracture Network, DFN.Lab

# Boundary Conditions and Geological Models

# Driving boundary conditions



## One cycle of warm and cold periods

| Impact     |                        | Start        | End          | BC  |
|------------|------------------------|--------------|--------------|-----|
| Repository | Heat source            | 0            | 5.000 years  | Q   |
| Permafrost | Temperature Reduction  | 5.000 years  | 15.000 years | T   |
|            | Permafrost Temperature | 15.000 years | 35.000 years | T   |
| Ice-Shield | Advance                | 35.000 years | 55.000 years | THM |
|            | Stagnation             | 55.000 years | 85.000 years | THM |
|            | Retreat                | 85.000 years | 95.000 years | THM |

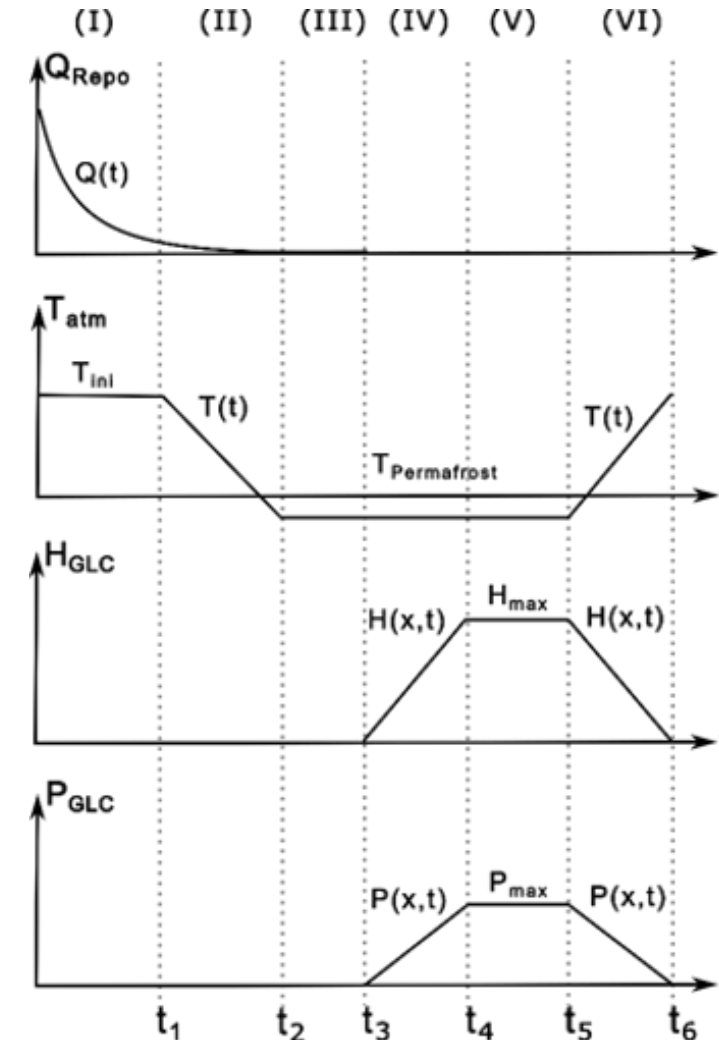



# Geological models salt and clay based on the generic ANSICHT - models

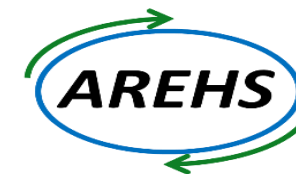

## 3D-Model: Salt (pillow)

Model area: 12 x 12 km<sup>2</sup>, elevation: 85 m NN to -1400 m NN, Host rock: Staßfurt salt

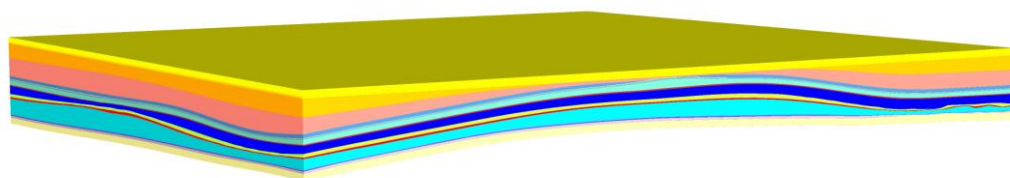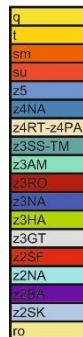

## 3D-Model: Clay (North Germany)

Model area: 12 x 10 km<sup>2</sup>, elevation 130 m NN to -4200 m NN, Host rock: Barremium and Hauterivium

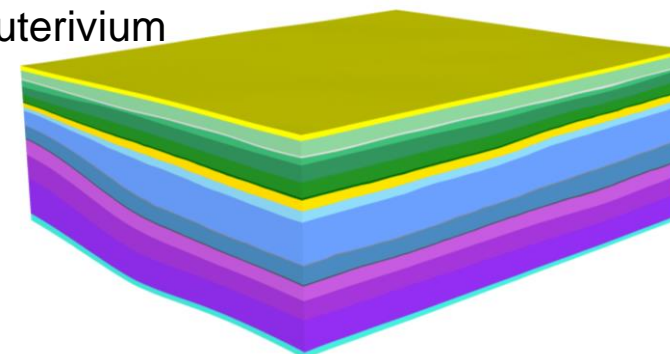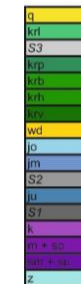

## 3D-Model: Salt (flat layering)

Model area: 10 x 7 km<sup>2</sup>, elevation: 87 m NN to -1500 m NN, Host rock: Staßfurt salt

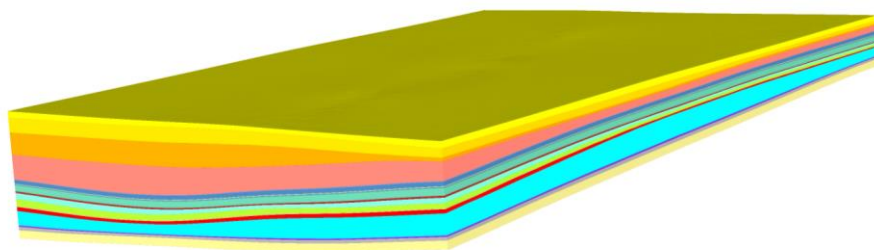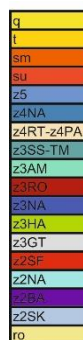

## 3D-Model: Clay (South Germany)

Model area: 22 x 7 km<sup>2</sup>, elevation: 565 m NN to -666 m NN, Host rock: Opalinuston

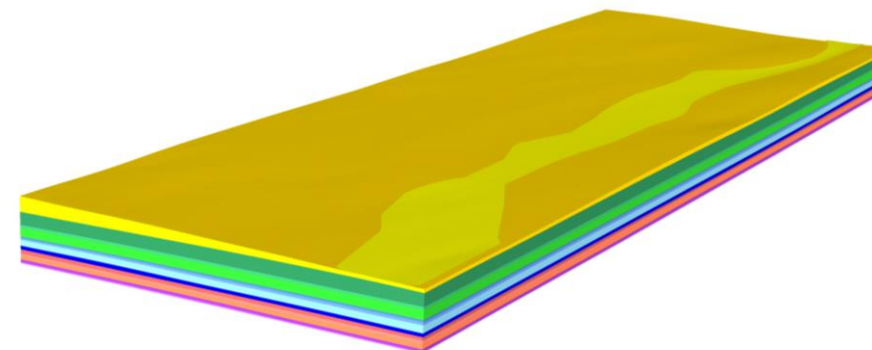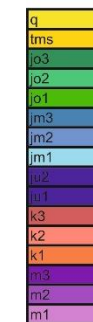

# Synthetic geological model crystalline



## 3D-Model: Crystalline rock – multiple host rock (generic!)

### Deterministic Fault network

- Orthogonal fault network with 1 km distance
- NW-SE striking faults with 70° dips towards NE
- SW-NE striking faults with 90° dips and
- One NNW-SSE striking fault, vertical

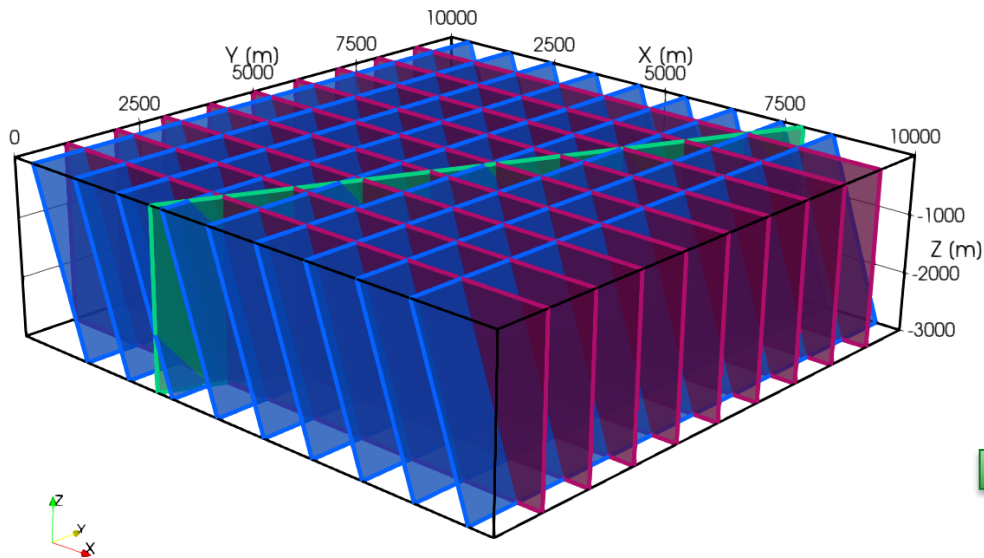

### Stochastic DFN

- 2 Joint Sets,
- Fisher-Orientation,
- Power Law Fracture Length distribution (min: 300 m, max: 1000 m),
- Fracture density decreases with depth
- „hydraulic active“ fractures (=isolated fractures are removed from DFN)

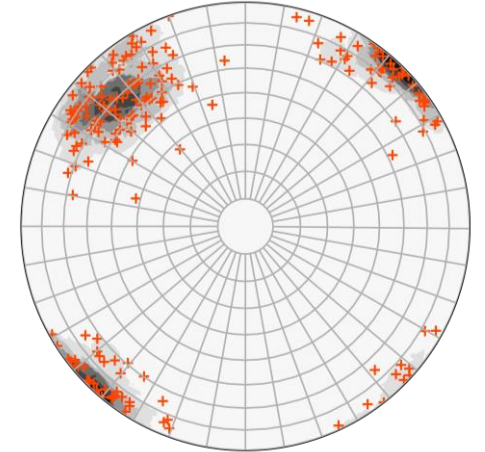

→ **Fault and fracture network used as geological model for the numerical simulation „multiple host rock“**

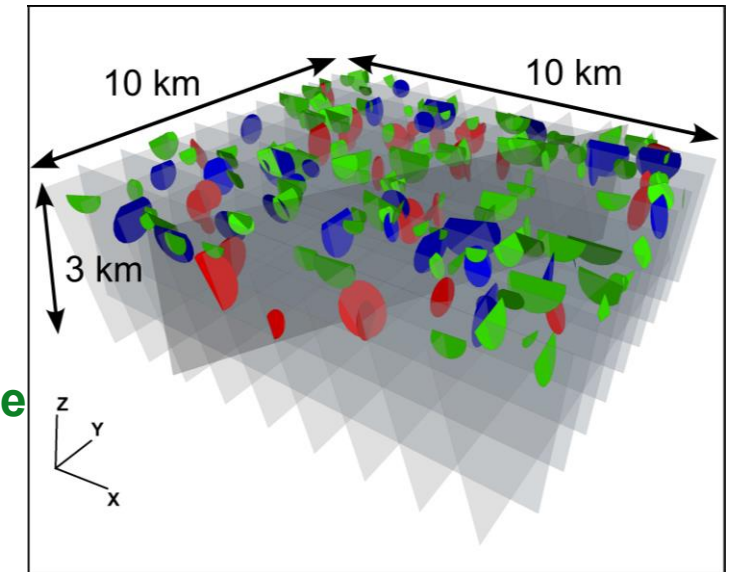

# Selected results of the modeling of future glacial cycles on THM-(C) processes

# Clay rock: Full glacial cycle model

## Clay North

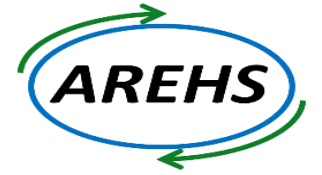

### Temporal development of the pressure change

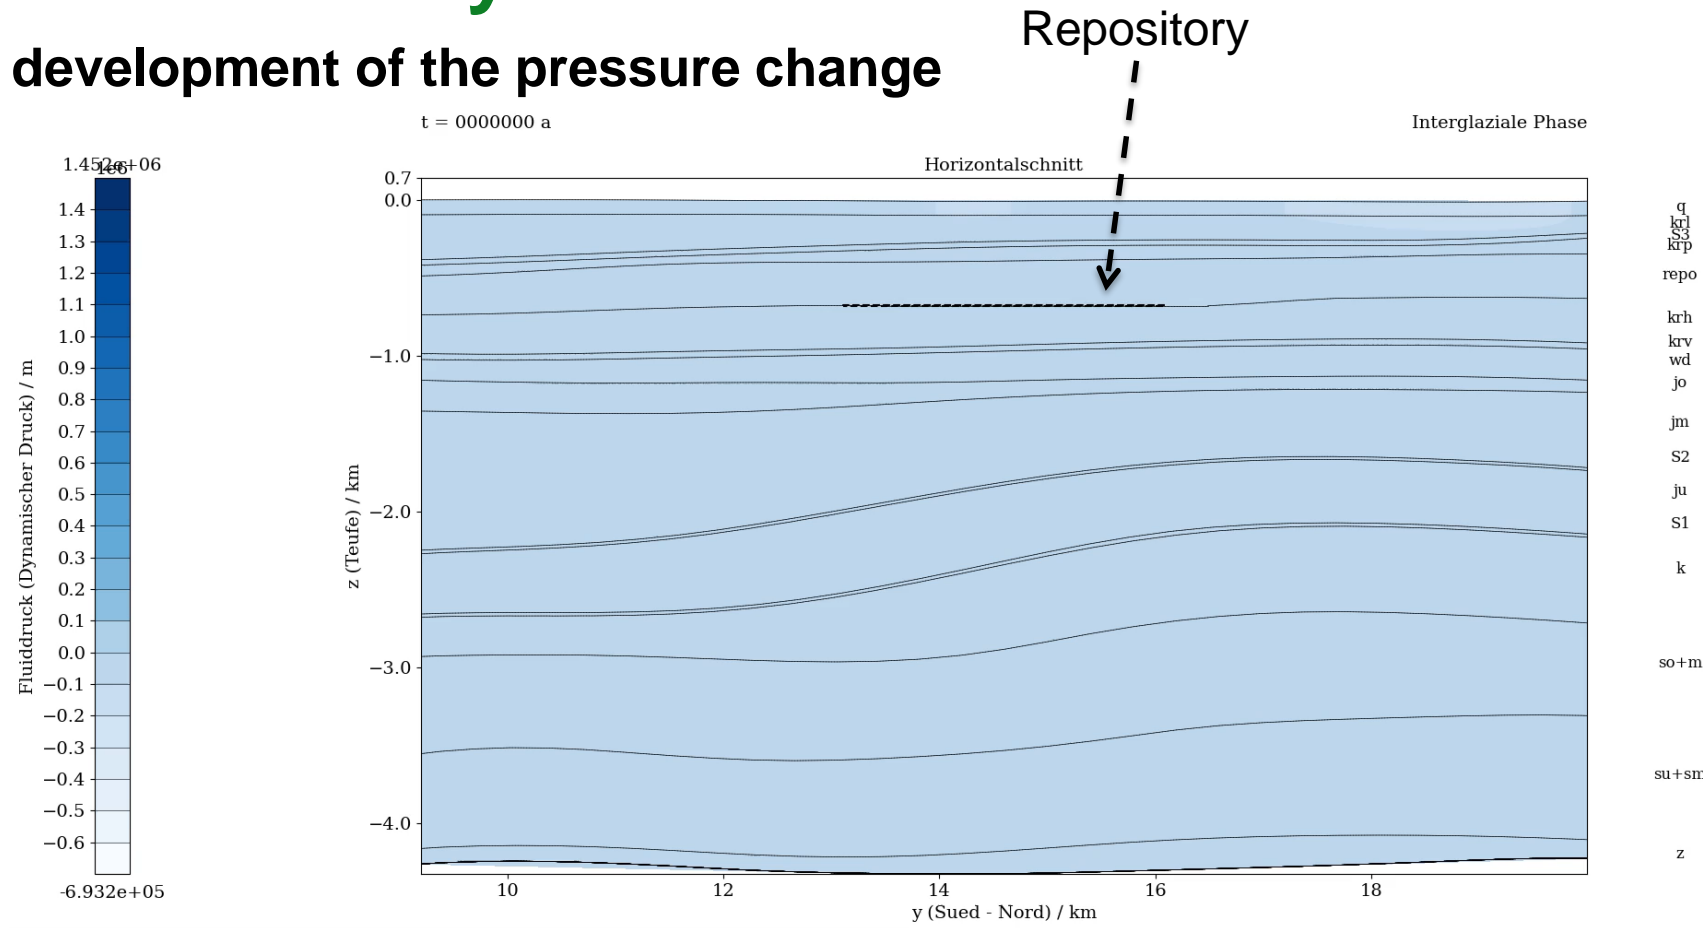

→ long-term (persistent) pressure anomalies due to THM coupling

# Model Clay South: Temperature and Darcy velocity @45000 yr



Temperature

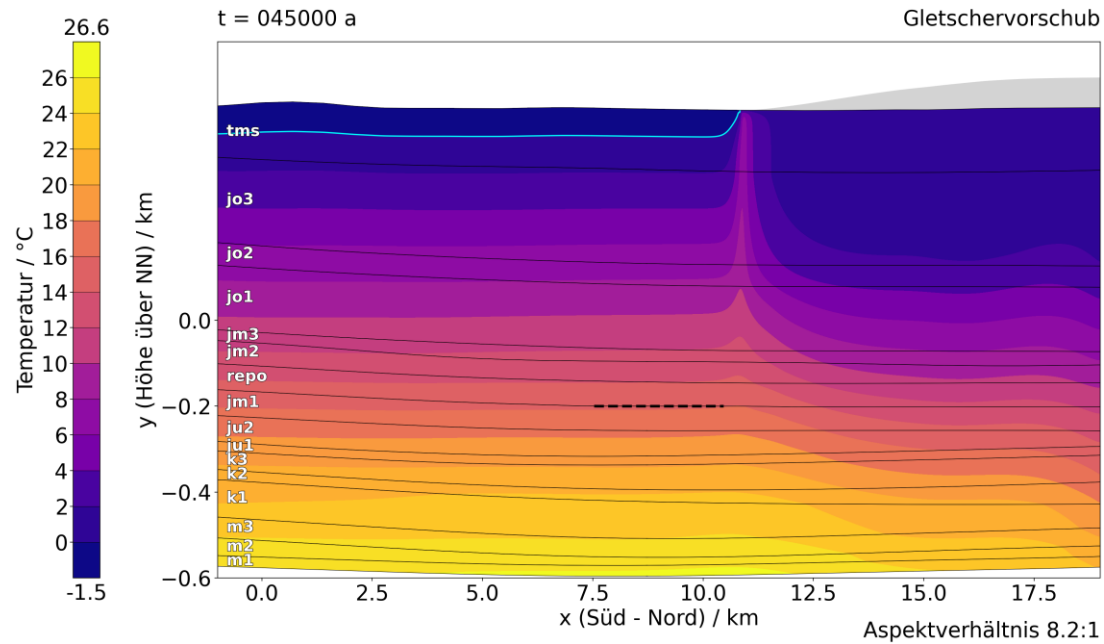

Darcy velocity

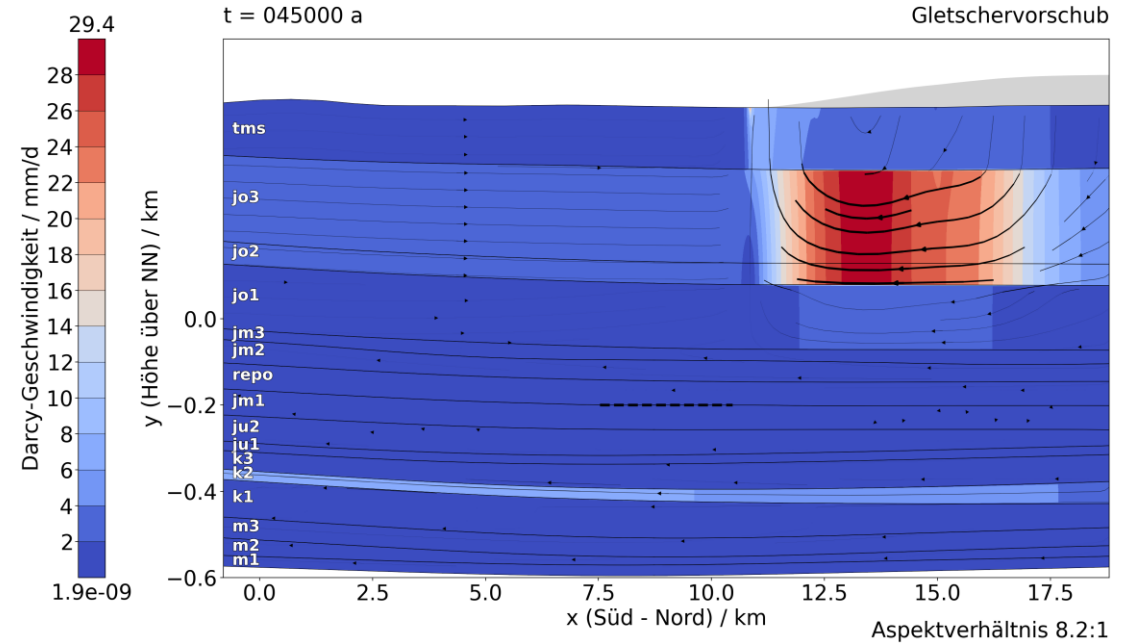

Convection induced by glacier BC and no flow BC caused by permafrost



# Salt rock: Two glacial cycles - Salt flat layering

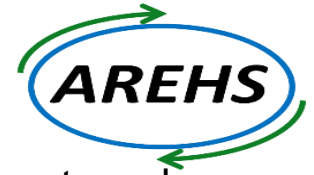

- Increasing temperature driven by repository heat
- Temperature driven displacement
- “Quick” dissipation of surplus heat
- No remaining influence in second cycle

1000 yr: repository heat prod

Temperature

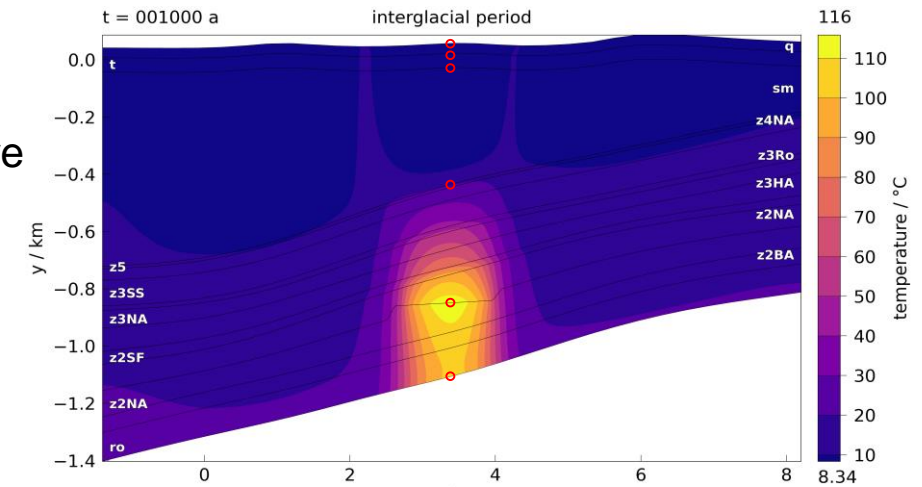

Temperature for different depths for two glacial cycles

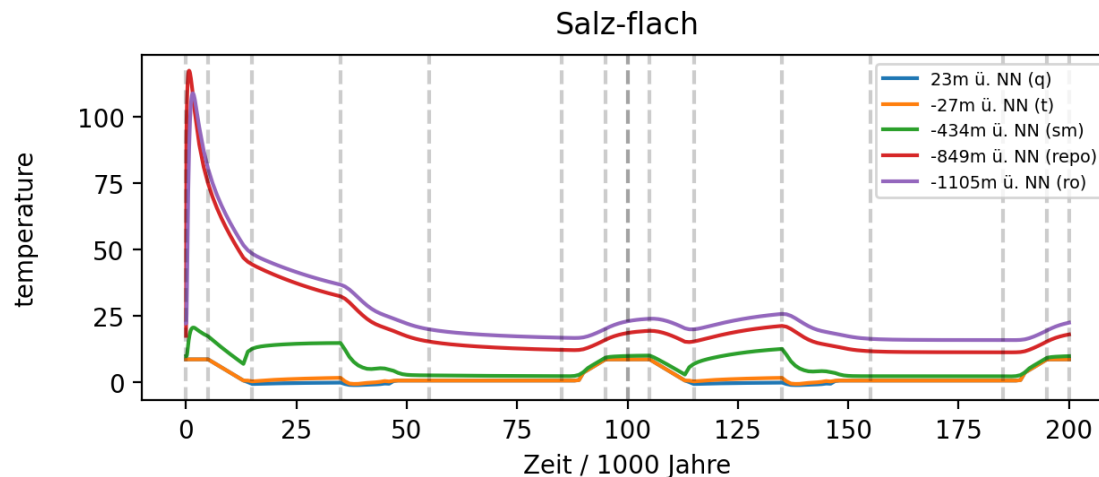

Displacement

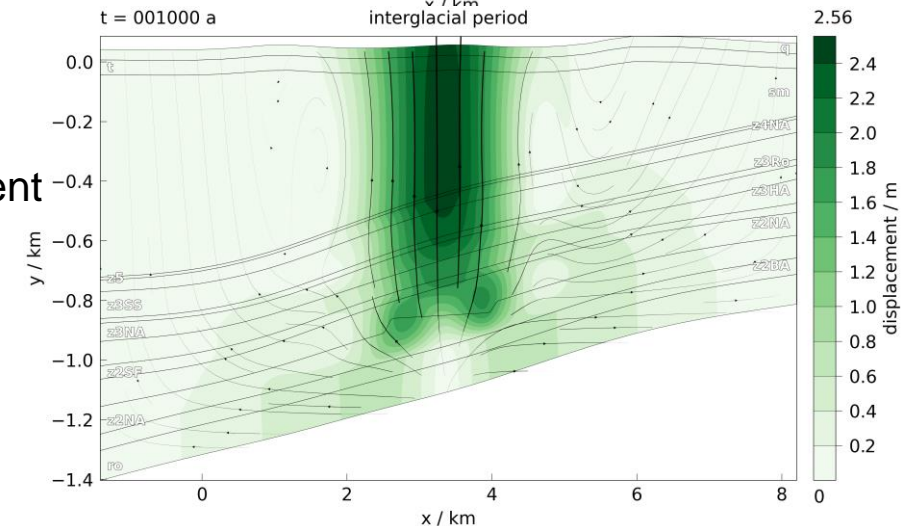

# Salt rock: Two glacial cycles model salt flat layering

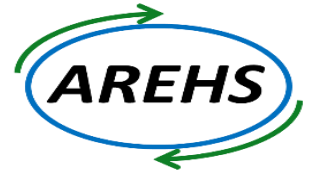

- Creep displacement accumulates in salt over time

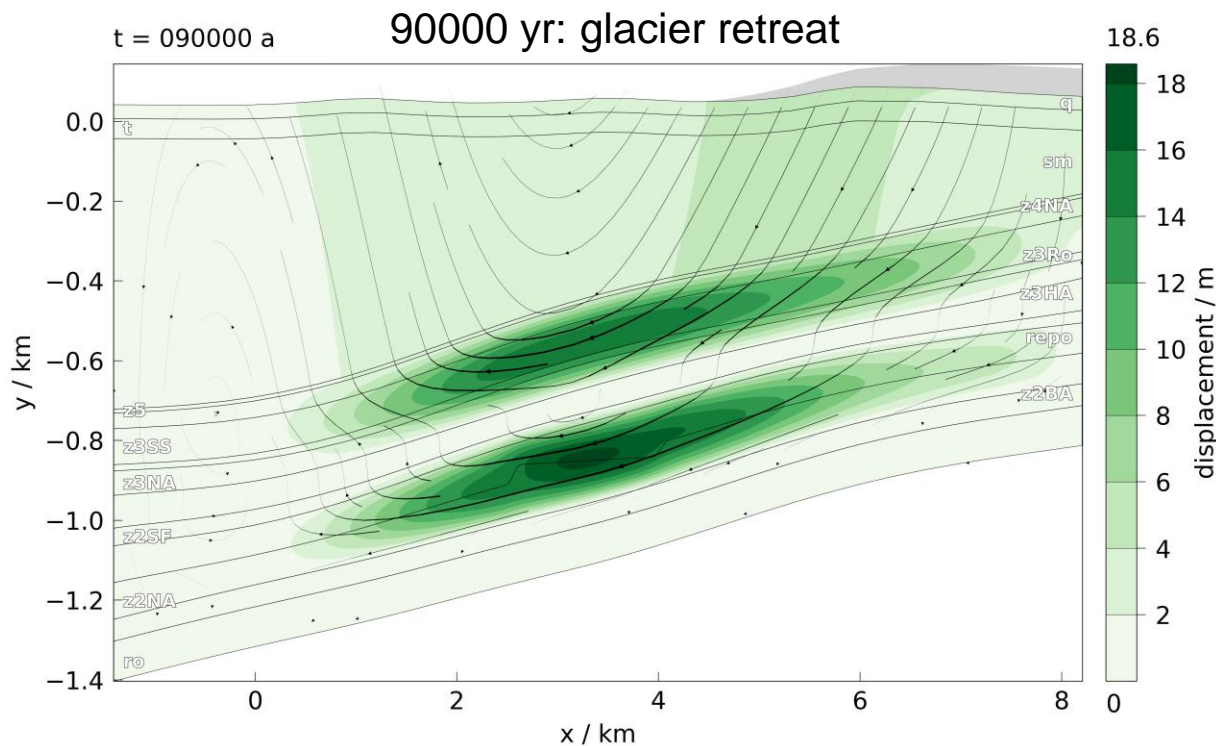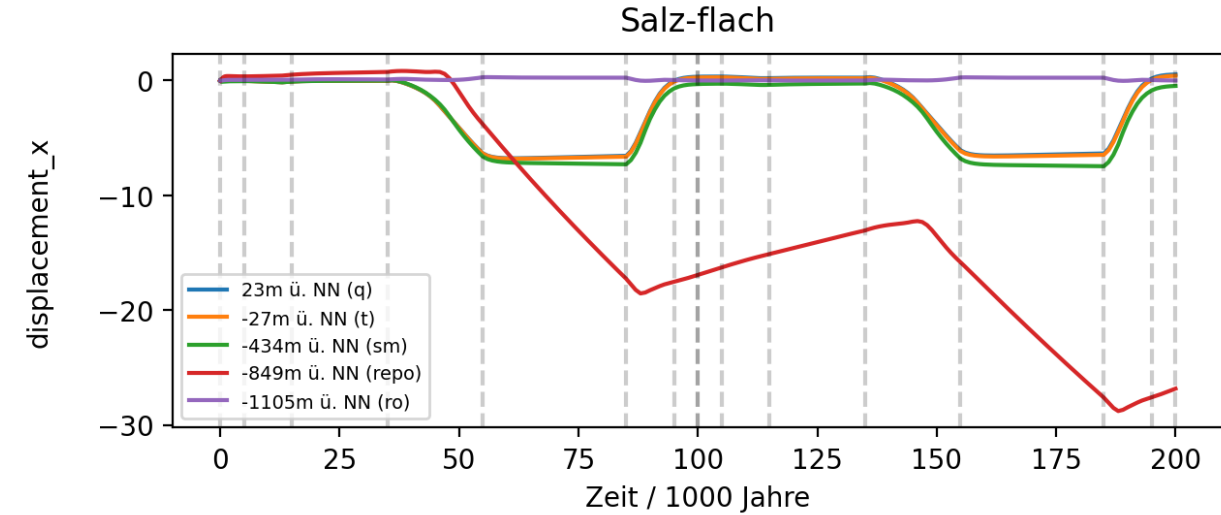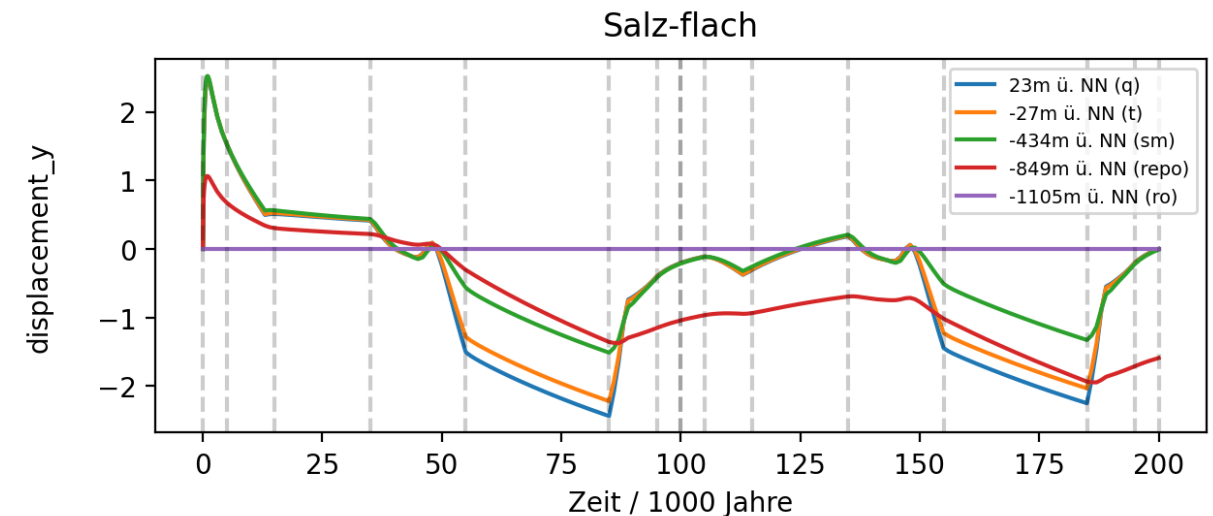

# Crystalline rock: Repository heating

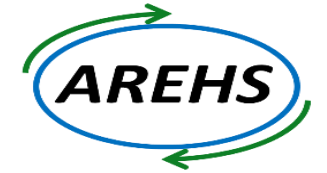

500 yr: repository heat prod

## Generic Repository (=Heat Source)

- Located in (mainly) undisturbed model area

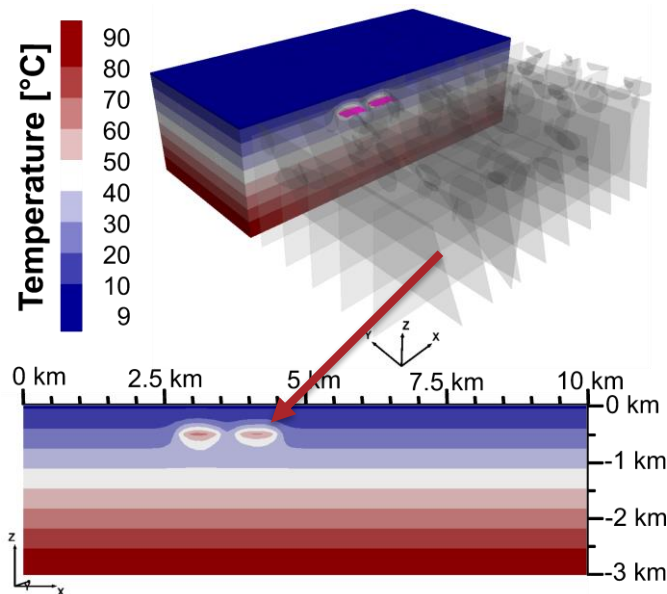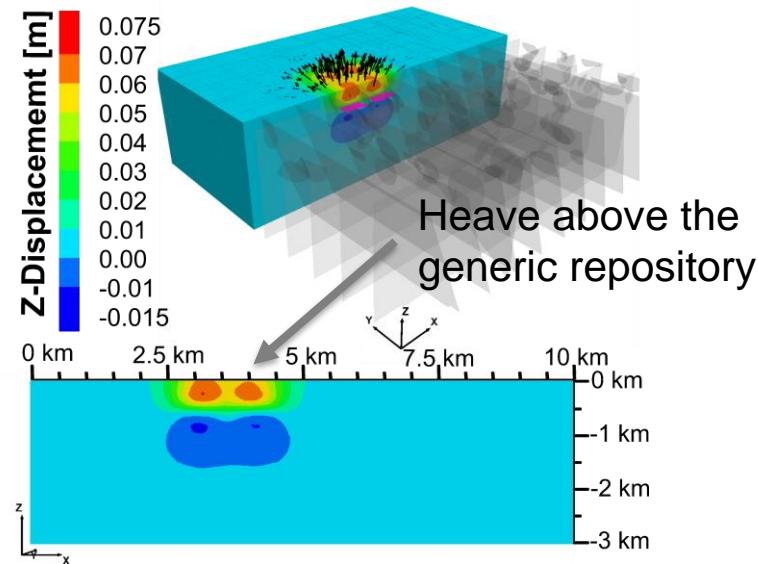

## Thermal Stresses:

- Increase of horizontal compression at repository level
- Decrease of horizontal compression at model surface

Fault Closure in the vicinity of the generic repository

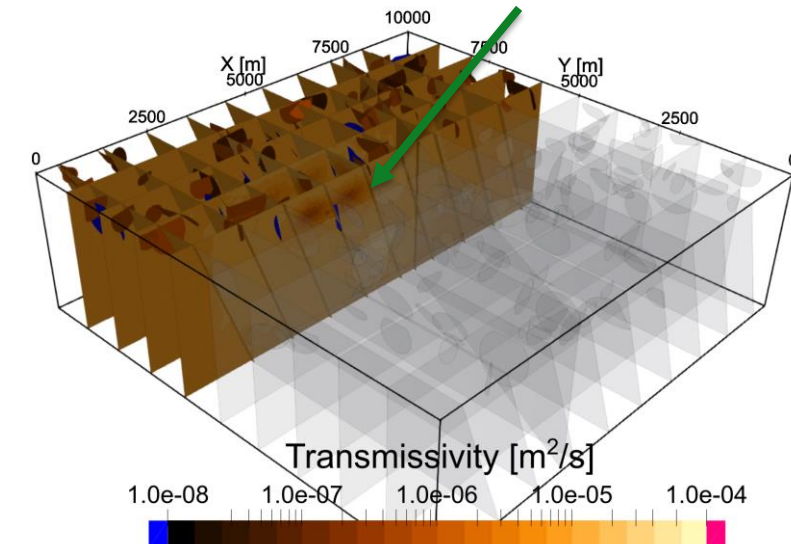



# Crystalline rock: Selected simulation results: Periglacial and glacial conditions

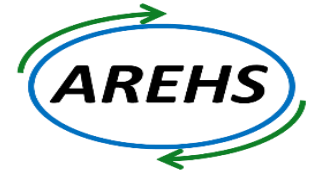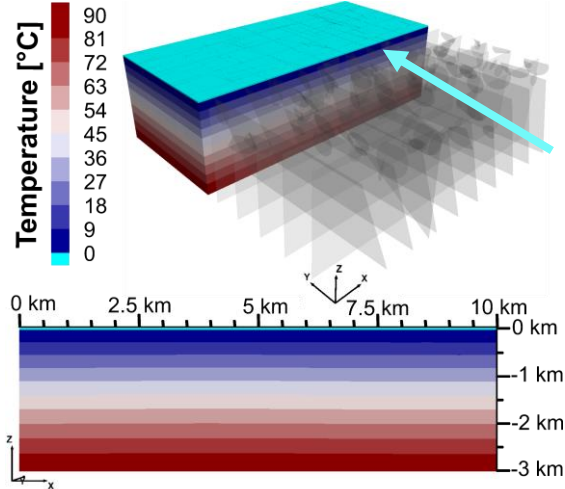

## Periglacial Conditions

- Formation of a continuous permafrost layer
- ~50 m depth

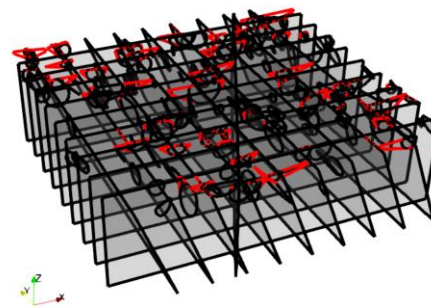

35000 yr: periglacial conditions

Thermal contraction triggers fracture growth (particularly close to model surface)

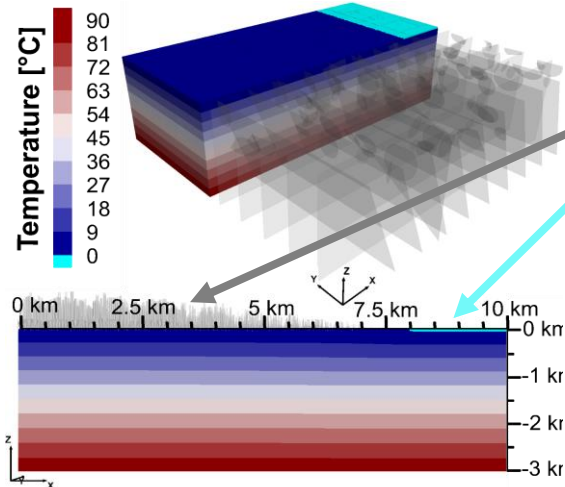

## Glacial Conditions

Ice-sheet  
proglacial permafrost

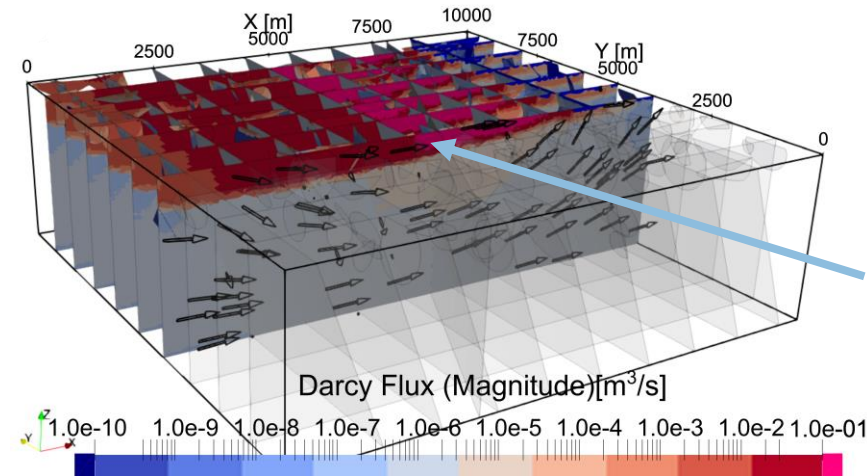

80000 yr: glacial conditions

Concentrated fluid infiltration beneath ice-shield

## Summary and future research

# Summary



## Clay rock

- Glacial cycles lead to persistent fingerprints of THM events
- Results depend on mechanical material model

## Salt rock

- Permanent changes in displacement field due to viscoplastic creeping
- Creep at small deviator stresses contributes to efficient removal of deviator stresses.

## Chrystalline rock

- “Self sealing” of the repository in the heating phase due to increased stresses
- Permafrost leads to rock failure and increase of transmissivity at surface
- Intensive water infiltration beneath the glacier leading to preverential flow pattern and possible reactivation of faults.
- **Simulaton „covered repository“ scenario by extraction of the BC from clay model**

# Summary

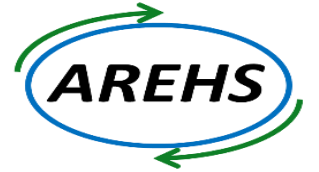

## General summary

- The simulation results correspond to trends reported in literature very well
- Full THM-process coupling is essential because all couplings show effects on the results
- The flow field in the underground completely changes in a warm – cold cycle
- Workflow as a solid basis to investigate specific sites in more detail
- Strong influence of BCs (effects of domain size have to be considered) → Mechanical BCs could also be extracted from larger-scale simulations
- Results could be used as boundary conditions for models on smaller scales, e.g. for detailed repository models

# Future research (selected items)



- Alternative material models need further investigation
- The whole OGS – workflow is ready for HPC and has successfully tested but needs further optimization
- Incorporation of far field effects has to be investigated
- Fault zones only have been explicitly investigated in crystalline rock, not in clay and salt rock
- The initial thermal, hydraulic and stress conditions have been simplified, they are much more complex for real sites

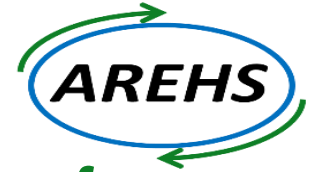

## AREHS:

Effects of changing boundary conditions on the evolution of hydrogeological systems: Numerical long-term modeling considering thermal-hydraulic-mechanical (-chemical) coupled effects (Ref-ID: 4719F10402)

Disclaimer: The presentation reflects the opinion of the AREHS research team but does not necessarily represent the opinion of BASE

**Thank you for your attention on behalf of the  
AREHS team!**
