# Supplementary material for: AREHS: effects of changing boundary conditions on the development of hydrogeological systems: numerical long-term modelling considering thermal–hydraulic–mechanical (–chemical) coupled effects
Source: Copernicus journal article supplement (doi:10.5194/sand-2-117-2023), 2023-09-06
Supplement: Supplementary file 2 [file sand-2-117-2023-supplement.zip]

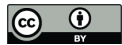

## *Supplement of*

# **AREHS: effects of changing boundary conditions on the development of hydrogeological systems: numerical long-term modelling considering thermal–hydraulic–mechanical (–chemical) coupled effects**

**René Kahnt et al.**

*Correspondence to:* René Kahnt ([r.kahnt@geosfreiberg.de](mailto:r.kahnt@geosfreiberg.de))

- [sand-2-117-2023-supplement-title-page.pdf](#)
- [sand-2023-104\\_2023\\_09\\_15\\_Kahnt\\_AREHS\\_safeND\\_v2.pdf](#)
- [sand-2023-104\\_SAFEND2023\\_POSTER\\_ZILL\\_MEISEL.pdf](#)

The copyright of individual parts of the supplement might differ from the article licence.
