# Supplementary material for: AREHS: effects of changing boundary conditions on the development of hydrogeological systems: numerical long-term modelling considering thermal–hydraulic–mechanical (–chemical) coupled effects
Source: Copernicus journal article supplement (doi:10.5194/sand-2-117-2023), 2023-09-06
Supplement: Supplementary file 3 [file sand-2-117-2023-supplement.zip]

Archive with 3 entries (3 files):
- sand-2023-104_SAFEND2023_POSTER_ZILL_MEISEL.pdf
- sand-2023-104_2023_09_15_Kahnt_AREHS_safeND_v2.pdf
- sand-2-117-2023-supplement-title-page.pdf
